# Supplementary material for: Effect of Lactic Acid Fermentation on Volatile Compounds and Sensory Characteristics of Mango (Mangifera indica) Juices
Source: MDPI journal article supplement (doi:10.3390/foods11030383), 2022-01-28
Supplement: s1 [file s1]

**Table S1.** Growth of different lactic acid bacteria (log CFU/mL) in mango juice after 24 h fermentation.

| Strain                                                       | 0 h          | 24 h         | P value |
|--------------------------------------------------------------|--------------|--------------|---------|
| <i>Lactobacillus acidophilus</i>                             | 6.81 ± 0.32b | 7.65 ± 0.22a | 0.044   |
| <i>Lactiplantibacillus plantarum</i> subsp. <i>plantarum</i> | 7.48 ± 0.14b | 8.94 ± 0.17a | 0.003   |
| <i>Lacticaseibacillus rhamnosus</i>                          | 7.44 ± 0.08b | 8.21 ± 0.24b | 0.040   |
| <i>Lacticaseibacillus. casei</i>                             | 7.30 ± 0.25  | 8.03 ± 0.25  | 0.111   |
| <i>Levilactobacillus brevis</i>                              | 7.41 ± 0.16b | 8.21 ± 0.23a | 0.047   |
| <i>Leuconostoc mesenteroides</i>                             | 7.50 ± 0.02  | 7.58 ± 0.05  | 0.118   |
| <i>Pediococcus pentosaceus</i>                               | 7.36 ± 0.08b | 8.08 ± 0.23a | 0.014   |
| <i>Lactobacillus fermentum</i>                               | 6.36 ± 0.53  | 7.41 ± 0.29  | 0.124   |
| <i>Lactobacillus johnsonii</i>                               | 5.95 ± 0.13a | < 1b         | <0.001  |
| <i>Limosilactobacillus reuteri</i>                           | 6.71 ± 0.62  | 7.56 ± 0.54  | 0.145   |

Results are expressed as mean ± SD. a, b values within rows with different lowercase letters differ significantly at  $p < 0.05$ .  $n = 3$ .

**Table S2.** Socio-demographic information of the consumers ( $n = 80$ ).

| Characteristic                 | Category                                        | <i>n</i> | %    |
|--------------------------------|-------------------------------------------------|----------|------|
| Age groups (years)             | 18 - 25                                         | 14       | 17.5 |
|                                | 26 - 33                                         | 40       | 50.0 |
|                                | 34 - 41                                         | 22       | 27.5 |
|                                | 42 - 49                                         | 4        | 5.00 |
| Gender                         | Female                                          | 36       | 45.0 |
|                                | Male                                            | 44       | 55.0 |
| Pay attention to diet          | Yes                                             | 49       | 61.3 |
|                                | No                                              | 31       | 38.8 |
| Frequency of fruit consumption | Once a week                                     | 16       | 20.0 |
|                                | More than once a week                           | 41       | 51.3 |
|                                | More than once a month but less than every week | 16       | 20.0 |
|                                | Less than once a month                          | 7        | 8.80 |

**Table S3.** Chemical structures of the terpene family<sup>a</sup>.

| Monoterpenes                                                                                                             |                                                                                                                             |                                                                                                                      |
|--------------------------------------------------------------------------------------------------------------------------|-----------------------------------------------------------------------------------------------------------------------------|----------------------------------------------------------------------------------------------------------------------|
| <p><math>\alpha</math>-Pinene</p> 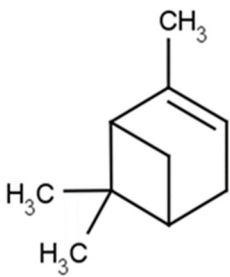      | <p><math>\alpha</math>-Fenchene</p>       | <p>Camphene</p>                   |
| <p><math>\delta</math>-3-Carene</p>     | <p><math>\alpha</math>-Phellandrene</p>  | <p><math>\beta</math>-pinene</p>  |
| <p><math>\beta</math>-Myrcene</p>     | <p><math>\alpha</math>-Terpinene</p>     | <p>Limonene</p>                 |
| <p><math>\gamma</math>-Terpinene</p>  | <p><math>\beta</math>-Ocimene</p>       | <p>b-phellandrene</p>           |

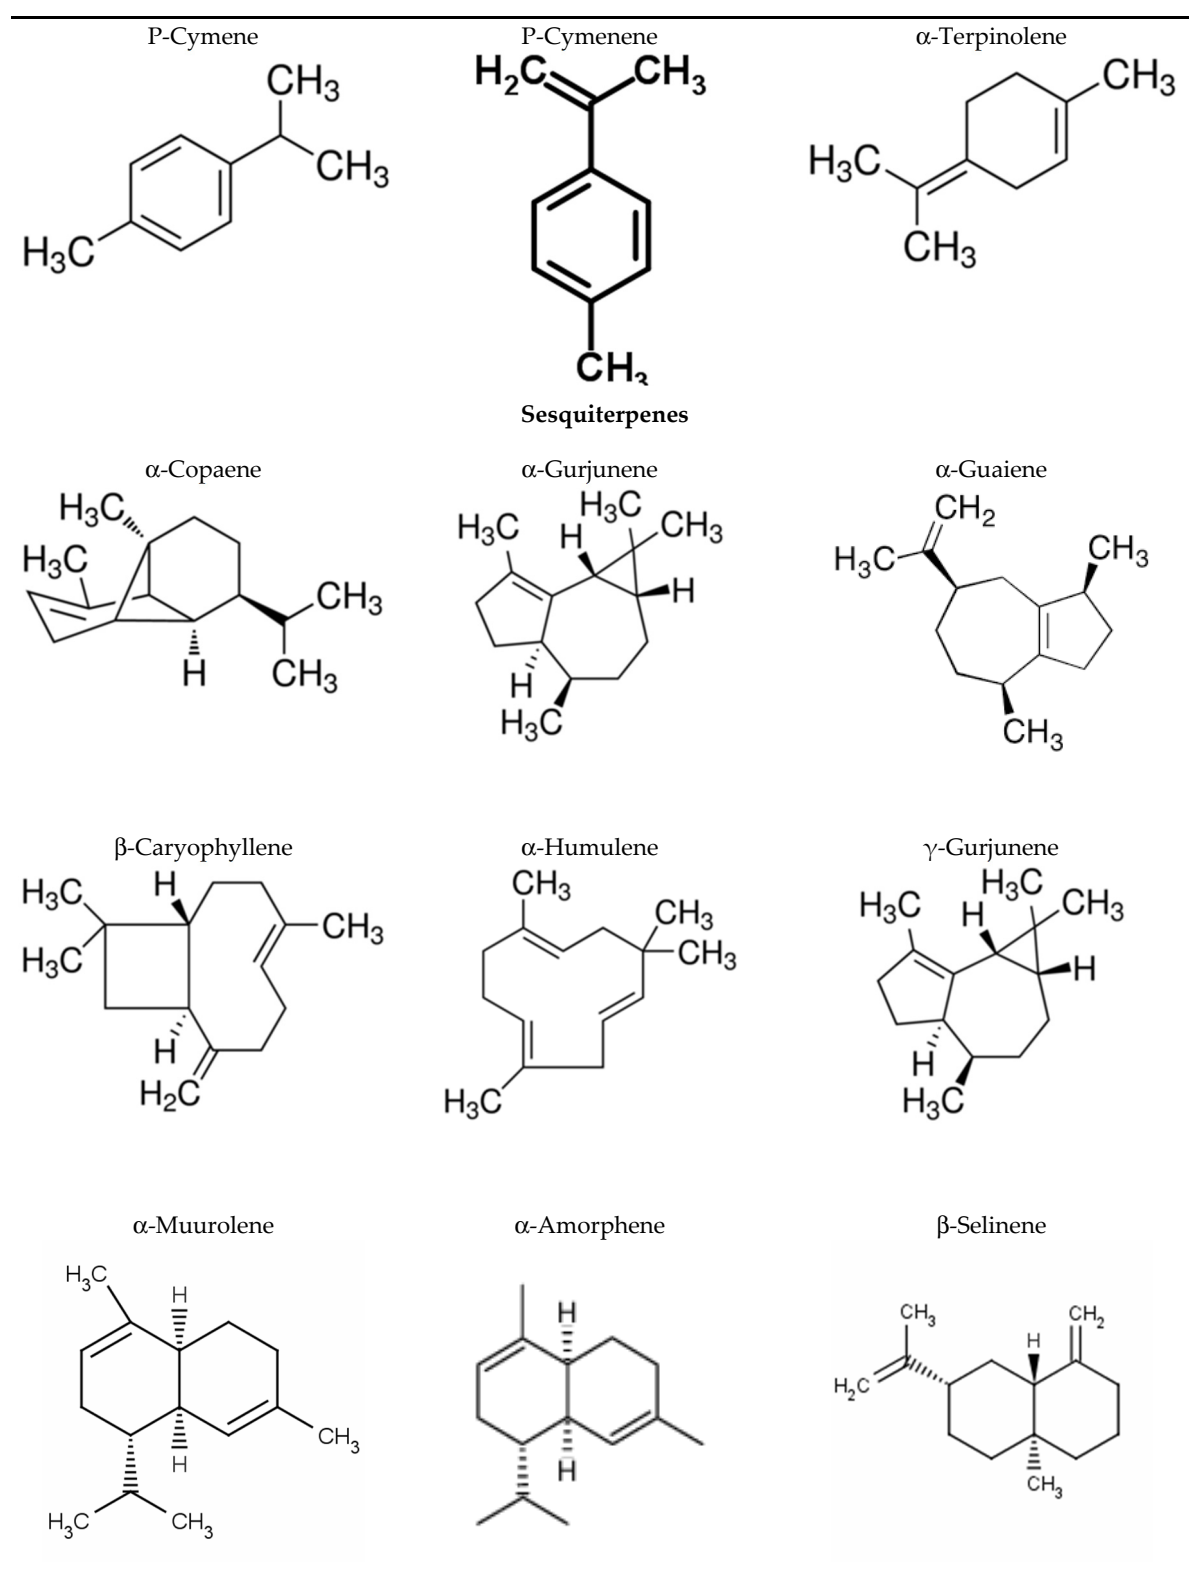

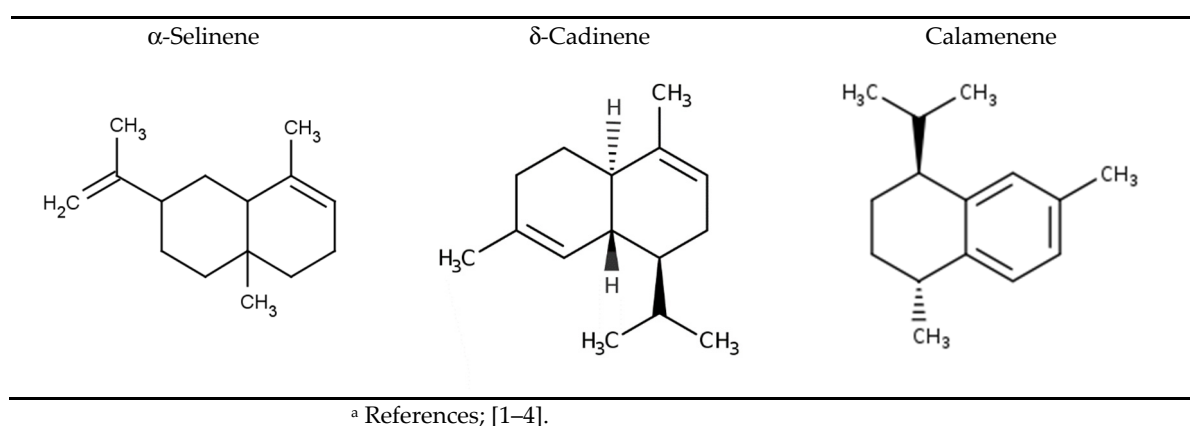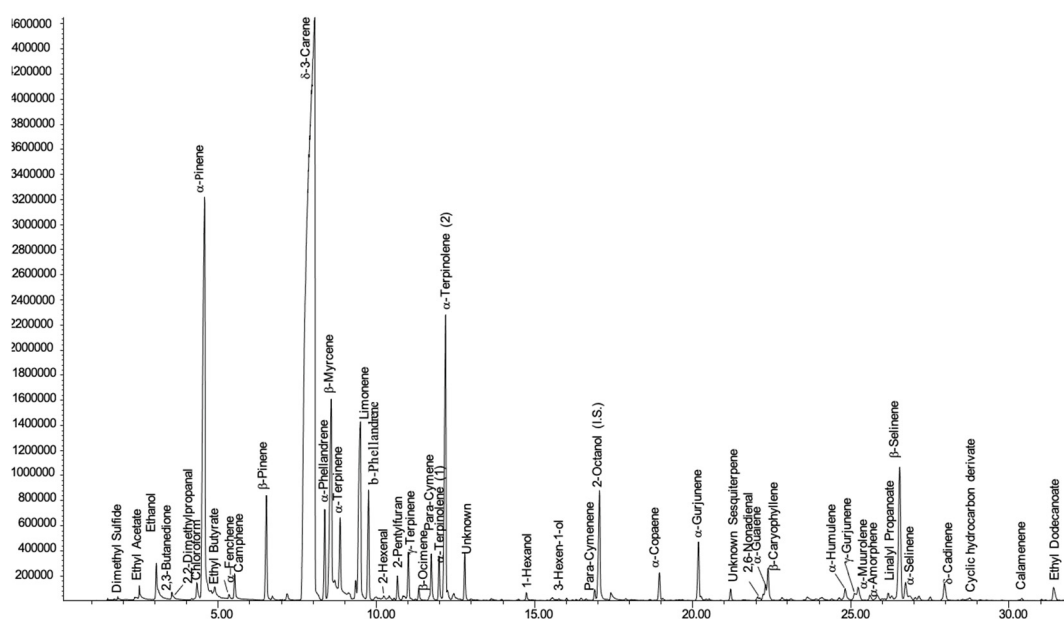

**Figure S1.** Chromatogram of the control juice (pasteurized mango juice with no lactic acid bacteria under the same conditions of fermentation (24 h)).

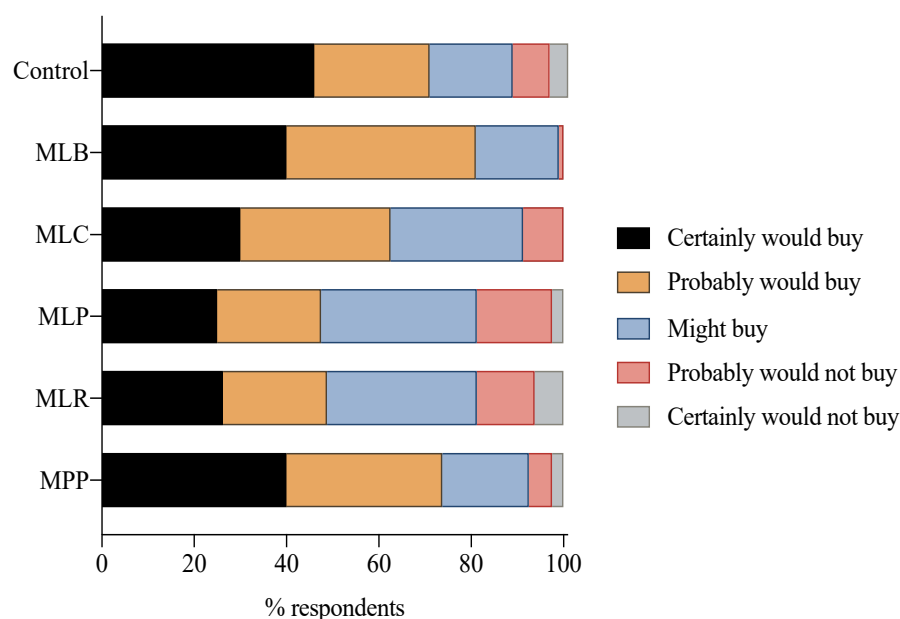

**Figure S2.** Purchase intent (% respondents,  $n = 80$ ). Mango juices fermented with MLB—*Levilactobacillus brevis*; MLC—*Lactocaseibacillus casei*; MLP—*Lactiplantibacillus plantarum* subsp. *plantarum*; MLR—*Lactocaseibacillus rhamnosus*; MPP—*Pediococcus pentosaceus*. Control is mango juice with no lactic acid bacteria under the same conditions of fermentation (24 h).

## References

1. Zielińska-Błajet, M.; Feder-Kubis, J. Monoterpenes and their derivatives—Recent development in biological and medical applications. *Int. J. Mol. Sci.* **2020**, *21*, 1–38. <https://doi.org/10.3390/ijms21197078>.
2. Huang, A.C.; Sefton, M.A.; Sumby, C.J.; Tiekink, E.R.; Taylor, D.K. Mechanistic studies on the autoxidation of  $\alpha$ -guaiene: Structural diversity of the sesquiterpenoid downstream products. *J. Nat. Prod.* **2015**, *78*, 131–145. <https://doi.org/10.1021/np500819f>.
3. Ehret, C.; Ourisson, G. Le gamma-Gurjunene, Structure et Configuration: Isomerisation de l'alpha-Gurjunene. *Tetrahedron* **1969**, *25*, 1785–1799.
4. Merck, K. GaA. Structure Search. 2022. Available online: <https://www.sigmaaldrich.com/BE/en/product/aldrich/> (accessed on 19 January 2022).
